# Supplementary material for: Continuous Purification of Biodiesel with Deep Eutectic Solvent in a Laboratory Karr Column
Source: MDPI journal article supplement (doi:10.3390/separations11030071), 2024-02-24
Supplement: s1 [file s1]

**Table S1.** Droplet size characteristic diameters and specific surface area.

| Plate | $\varphi_D, \%$ | $m(\text{DES})/m(\text{BD})$ | $Af, \text{ m s}^{-1}$ | $d_{\min}, \text{ mm}$ | $d_{\text{av}}, \text{ mm}$ | $d_{\max}, \text{ mm}$ | $d_{32}, \text{ mm}$ | $a, \text{ m}^2 \text{ m}^{-3}$ |
|-------|-----------------|------------------------------|------------------------|------------------------|-----------------------------|------------------------|----------------------|---------------------------------|
| A     | 15.8            | 0.24                         | 0.013                  | 0.20                   | 0.30                        | 3.35                   | 1.08                 | 876.18                          |
|       | 15.8            | 0.24                         | 0.020                  | 0.30                   | 0.45                        | 2.91                   | 0.85                 | 1114.72                         |
|       | 15.8            | 0.24                         | 0.027                  | 0.20                   | 0.50                        | 2.91                   | 0.69                 | 1357.34                         |
|       | 20.0            | 0.32                         | 0.020                  | 0.25                   | 0.50                        | 3.22                   | 0.85                 | 1411.98                         |
|       | 25.0            | 0.42                         | 0.020                  | 0.25                   | 0.40                        | 3.62                   | 0.85                 | 1764.97                         |
| B     | 15.8            | 0.24                         | 0.013                  | 0.30                   | 0.30                        | 3.61                   | 1.08                 | 876.18                          |
|       | 15.8            | 0.24                         | 0.020                  | 0.20                   | 0.35                        | 3.01                   | 0.85                 | 1114.72                         |
|       | 15.8            | 0.24                         | 0.027                  | 0.30                   | 0.45                        | 3.01                   | 0.69                 | 1357.34                         |
|       | 20.0            | 0.32                         | 0.020                  | 0.25                   | 0.40                        | 3.40                   | 0.85                 | 1411.98                         |
|       | 25.0            | 0.42                         | 0.020                  | 0.20                   | 0.30                        | 4.26                   | 0.85                 | 1764.97                         |
| C     | 15.8            | 0.24                         | 0.020                  | 0.20                   | 0.30                        | 2.08                   | 0.85                 | 1114.72                         |
|       | 20.0            | 0.32                         | 0.020                  | 0.10                   | 0.20                        | 2.72                   | 0.85                 | 1411.98                         |
|       | 25.0            | 0.42                         | 0.020                  | 0.15                   | 0.20                        | 3.01                   | 0.85                 | 1764.97                         |
